# Supplementary material
Source: PubMed Central journal article supplement (PMC4875422)
Supplement: 13238_2012_2017_MOESM1_ESM.pdf [file 13238_2012_2017_MOESM1_ESM.pdf]

Table S1 Sensitivity of real time PCR using purified genomic DNA of *V. parahaemolyticus*

| Genomic DNA concentrations | C <sub>t</sub> (dR) | Quantity (copies/ mL) |
|----------------------------|---------------------|-----------------------|
| 2.4 ng/μL                  | 18.93±0.15          | 2.03×10 <sup>9</sup>  |
| 240.0 pg/μL                | 22.19±0.83          | 2.03×10 <sup>8</sup>  |
| 24.0 pg/μL                 | 25.96±0.11          | 2.03×10 <sup>7</sup>  |
| 2.4 pg/μL                  | 29.26±0.64          | 2.03×10 <sup>6</sup>  |
| 240.0 fg/μL                | 32.63±0.01          | 2.03×10 <sup>5</sup>  |
| 24.0 fg/μL                 | 36.28±0.28          | 2.03×10 <sup>4</sup>  |
| 2.4 fg/μL                  | 37.78±1.06          | 2.03×10 <sup>3</sup>  |
| 0.24 fg/μL                 | No C <sub>t</sub>   | 2.03×10 <sup>2</sup>  |
| Negative control           | No C <sub>t</sub>   | 0                     |

Table S2 Sensitivity of real time PCR using *V. parahemolyticus* bacterial cultures

| <i>V. parahaemolyticus</i> concentrations (CFU/ mL) | C <sub>t</sub> (dR) |
|-----------------------------------------------------|---------------------|
| 1.61×10 <sup>7</sup>                                | 21.28±0.11          |
| 1.61×10 <sup>6</sup>                                | 22.56±0.13          |
| 1.61×10 <sup>5</sup>                                | 26.42±0.09          |
| 1.61×10 <sup>4</sup>                                | 29.77±0.15          |
| 1.61×10 <sup>3</sup>                                | 32.81±0.14          |
| 1.61×10 <sup>2</sup>                                | 36.07±0.26          |
| 1.61×10 <sup>1</sup>                                | No C <sub>t</sub>   |
| Negative control                                    | No C <sub>t</sub>   |
